# Supplementary material for: Acute Promyelocytic Leukemia: Update on the Mechanisms of Leukemogenesis, Resistance and on Innovative Treatment Strategies
Source: Preprints.org preprint supplement (doi:10.20944/preprints201910.0159.v1), 2019-10-14
Supplement: Supplementary file 3 [file supplementary]

Nelida Ines Noguera [n.noguera@hsantalucia.it](mailto:n.noguera@hsantalucia.it) or [nelida.ines.noguera@uniroma2.it](mailto:nelida.ines.noguera@uniroma2.it)

Orcid: 0000-0001-7682-862X

Gianfranco Catalano [gianfranco.catalano@uniroma2.it](mailto:gianfranco.catalano@uniroma2.it)

Cristina Banella [cristina.banella@gmail.com](mailto:cristina.banella@gmail.com)

Mariadomenica Divona [mariadomenica.divona@ptvonline.it](mailto:mariadomenica.divona@ptvonline.it)

Isabella Faraoni [faraoni@med.uniroma2.it](mailto:faraoni@med.uniroma2.it)

Tiziana Ottone [tiziana.ottone@uniroma2.it](mailto:tiziana.ottone@uniroma2.it)

William Arcese [william.arcese@ptvonline.it](mailto:william.arcese@ptvonline.it)

Maria Teresa VosoVoso@med.uniroma2.it
